# Supplementary material for: Microbial Communities and Interactions of Nitrogen Oxides With Methanogenesis in Diverse Peatlands of the Amazon Basin
Source: PubMed Central journal article supplement (PMC8276178; doi:10.3389/fmicb.2021.659079), 2021-06-29
Supplement: Data_Sheet_1.pdf [file Data_Sheet_1.pdf]

*Supplementary Material*

**Microbial Communities and Interactions of Nitrogen Oxides With  
Methanogenesis in Diverse Peatlands of the Amazon Basin**

S. Buessecker, Z. Zamora, A. F. Sarno, D. R. Finn, A. M. Hoyt, J. van Haren, J. D. Urquiza Muñoz,  
and H. Cadillo-Quiroz

Correspondence to: H. Cadillo-Quiroz ([hinsby@asu.edu](mailto:hinsby@asu.edu))

## 1 Supplementary Discussion

**Dissolved organic carbon (DOC) profiles.** DOC has emerged as an important predictor of CH<sub>4</sub> production in wetland soils (Liu et al., 2012; Morrissey et al., 2013). In comparison, DOC concentrations obtained in this study are at the lower end of values previously reported from Borneo peats (Gandois et al., 2014). All concentration profiles appear stable along soil depth with no indication of sinks. These would conceivably occur in more shallow regions where the fraction of refractory soil carbon is less prevalent (Artz et al., 2006). A DOC sink due to mineralization is not present based on our data. The DOC pool is comprised of diverse organic molecules characterized by a wide molecular size range, organic acids, humic substances of different aromaticities, and protein groups. These compounds may vary with depth even though the bulk concentration may be stagnant. Extracellular enzymes and humic substances may play a crucial role in diverting electron flow from methanogenesis, given the thermodynamic preference over CO<sub>2</sub> (Heitmann et al., 2007; Knorr and Blodau, 2009), that would ultimately suppress CH<sub>4</sub> production. Based on our results, we can exclude fluctuations of the total DOC pool to have major effects on carbon mineralization in distinct soil layers, but organic compounds could structurally differ along depth and impact specific microbial activities.

***Xanthobacteriaceae* and Bathyarchaeota are potentially important decomposers of organic matter in tropical peat soils.** The high abundance of *Xanthobacteriaceae* and Bathyarchaeota (Fig. S3) across sites is likely related to a putative role as degraders of peat organic matter. Particularly under O<sub>2</sub>-limiting conditions, *Xanthobacteriaceae* have a broad suite of organic substrates, including alkanes, alkenes, (poly)aromatic compounds, thiopenes, organic acids, or xylose and xylan (Zaichikova et al., 2010). Those substrates are common and accumulate in peat soils

(Moers et al., 1990). Bathyarchaeota is an abundant group likely to have been overlooked by the lack of recognition of the phyla in older databases (as in SILVA 115 or priors; (Bai et al., 2018), or because several primers are incapable of amplification (like the *mcrA* set in this study that has 10-18 base pair mismatches; (Evans et al., 2015)). The genetic potential of Bathyarchaeota includes enzymes to hydrolyze plant-derived carbohydrates and detrital proteins, and to produce acetate for energy conservation (Lazar et al., 2016). A putative relationship Bathyarchaeota-NO<sub>x</sub> is supported by a report indicating that NO<sub>2</sub><sup>-</sup>/NO<sub>3</sub><sup>-</sup> transporter proteins, an enzymatic set to support DNRA, were detected in reconstructed Bathyarchaeota metagenomes (Lazar et al., 2016). PC analysis indicates such interactions, where Bathyarchaeota diversity, pH and NO<sub>x</sub> concomitantly explain over 50% of data variation along PC 1 (Fig. 2B).

## 2 Supplementary Figures and Tables

### 2.1 Supplementary Figures

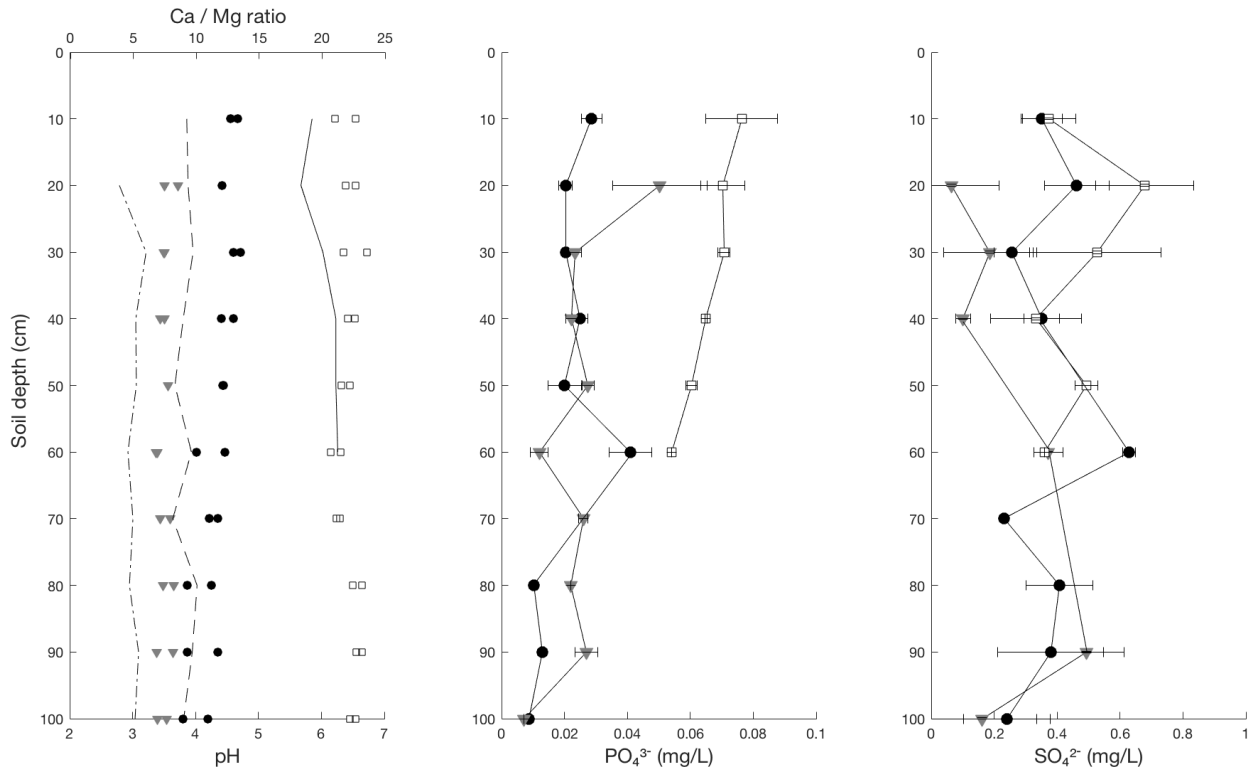

**Supplementary Figure 1. Left panel:** Ca/Mg ratio in lines for QUI (dashed), BVA (solid), and SJO (point-dashed). pH in symbols for QUI (circles), SJO (triangles), and BVA (squares). Each point is derived from one replicate soil core. **Middle panel:** PO<sub>4</sub><sup>3-</sup> concentration with data points representing the mean of values from replicate soil cores. **Right panel:** SO<sub>4</sub><sup>2-</sup> concentration with data points representing the mean of values from replicate soil cores. Error bars denote one *SD* and symbols are consistent with left panel.

Pore water of SJO strongly resembles rainwater composition (Ca/Mg mean of ~8.8, Honório et al., 2010). BVA is likely influenced by groundwater (vertical or lateral water movements) that provides the peat body with minerals. Minerotrophic peatlands have a mineral-derived alkalinity that counteracts acidification caused by the degradation of plant litter and the release of organic acids. Ombrotrophic peatlands are characterized by a low basic cation content that lacks buffer capacity. BVA is a minerotrophic site, where as QUI is transitional minerotrophic-ombrotrophic. SJO is strictly ombrotrophic and the convex shape of this peatland further induces a barrier for groundwater to reach top soil layers (Lähteenoja et al., 2009).

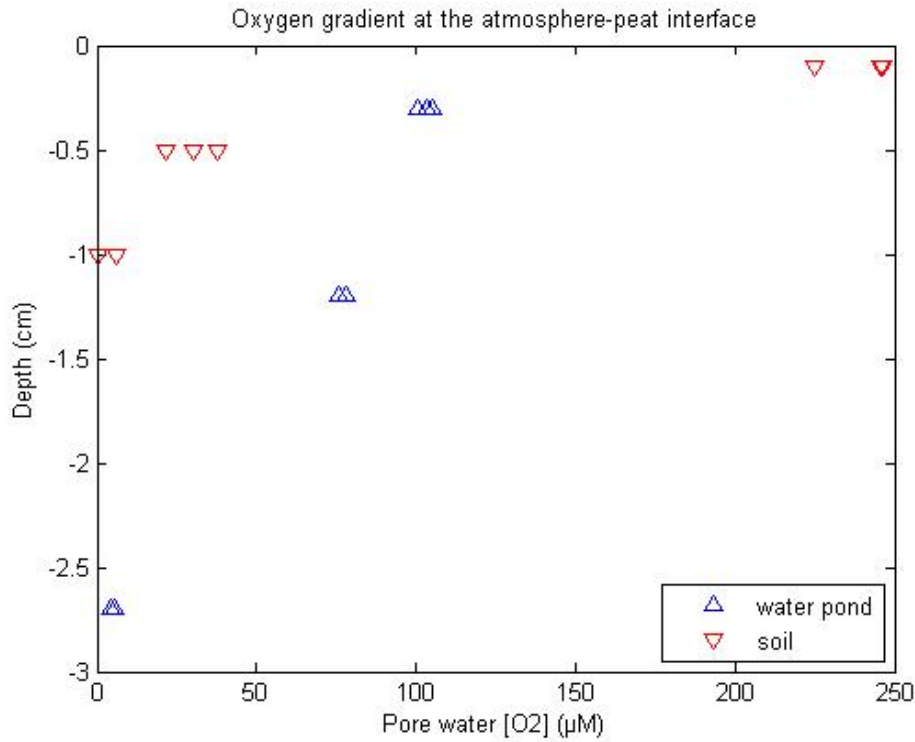

**Supplementary Figure 2. Dissolved oxygen concentration in water of saturated soil.**

Measurements were done using a microelectrode, which was either inserted directly into soft peat (red symbols) or into a shallow (~3 cm) water pond (blue symbols). Measurements were conducted in QUI peatland showing O<sub>2</sub> concentrations drop below 1 µM detection levels after 1 or 2.7 cm depths.

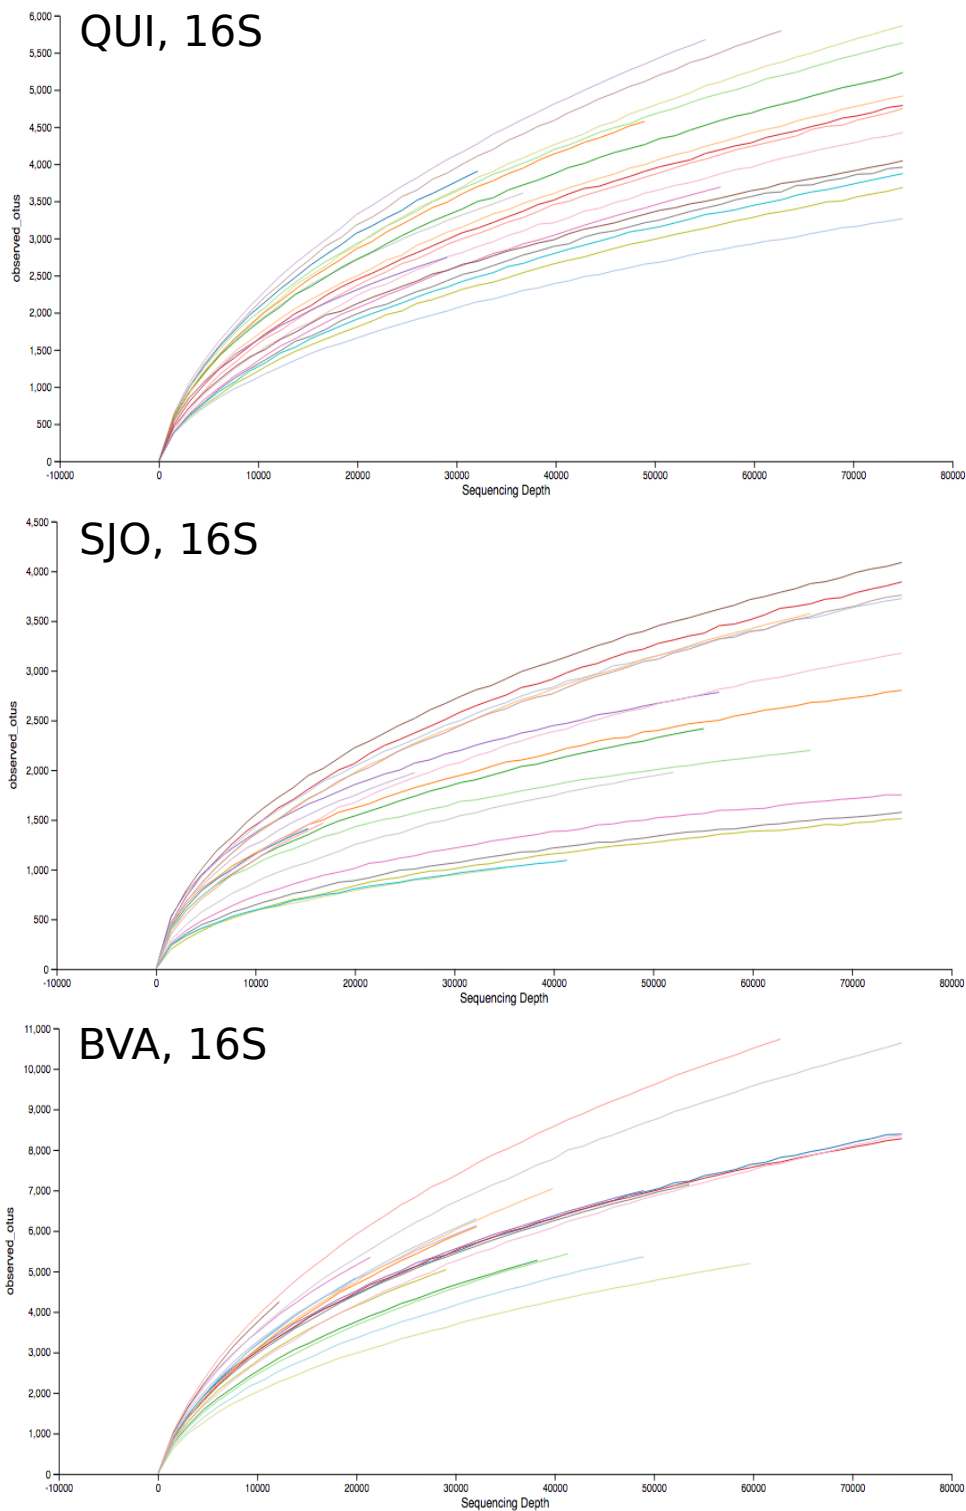

**Supplementary Figure 3.** Alpha-rarefaction curves for 16S rRNA sequences, used to adjust for variability in library size across samples. Rarefaction curves were used to determine the minimum number of reads per sample used for alpha diversity metrics.

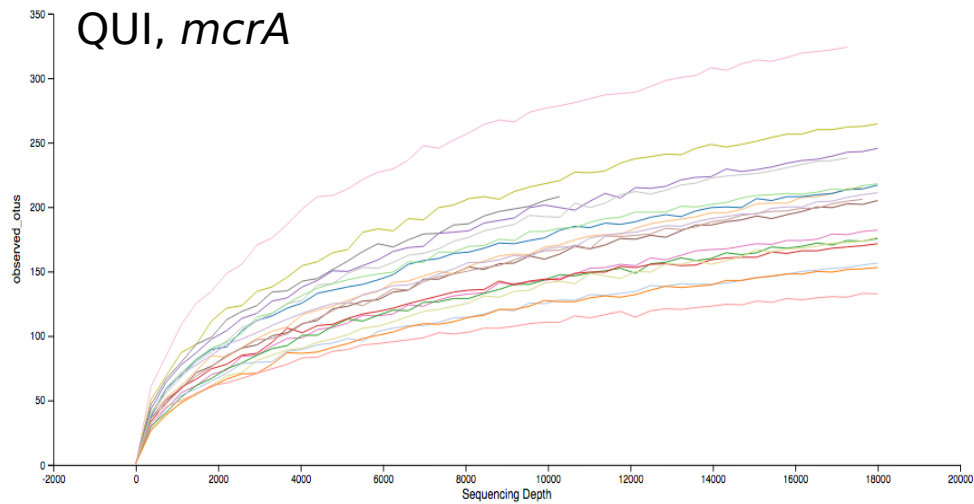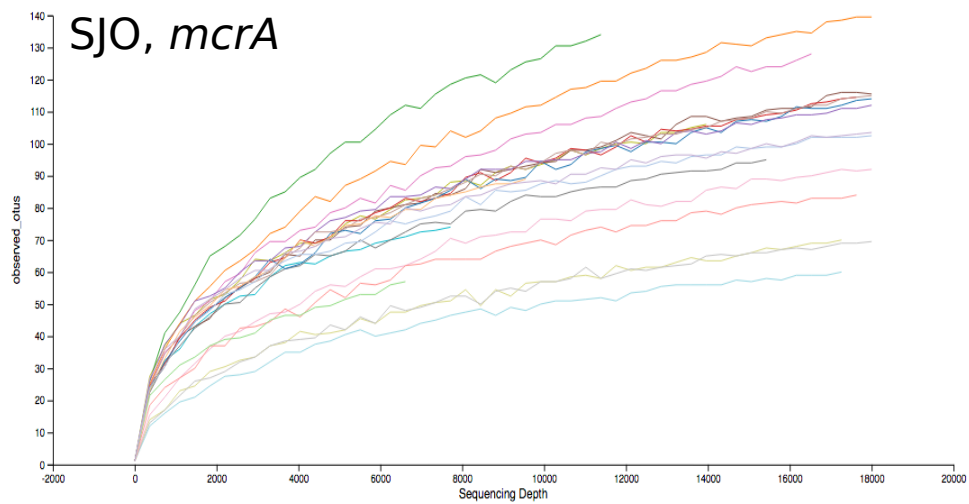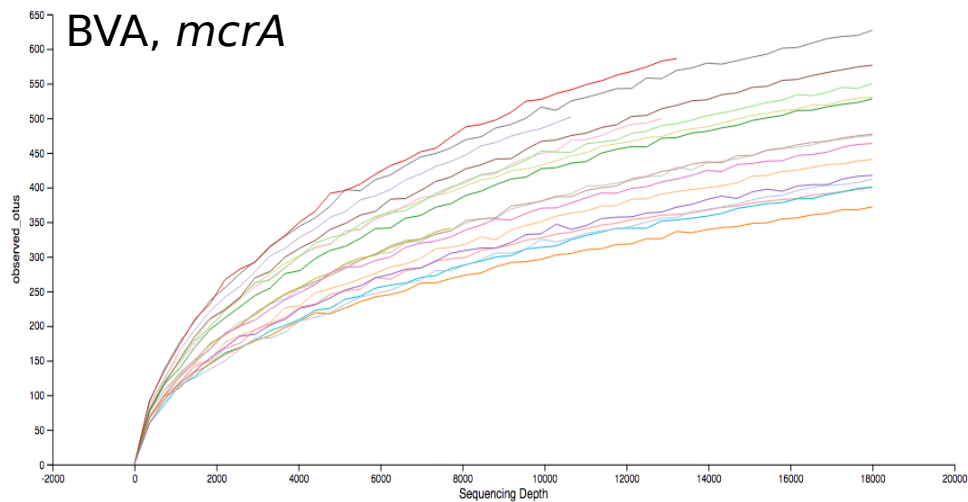

**Supplementary Figure 3 continued.** Alpha-rarefaction curves for *mcrA* sequences, used to adjust for variability in library size across samples. Rarefaction curves were used to determine the minimum number of reads per sample used for alpha diversity metrics. Samples were rarefied to 20,000 reads per sample (Yang et al., 2017).

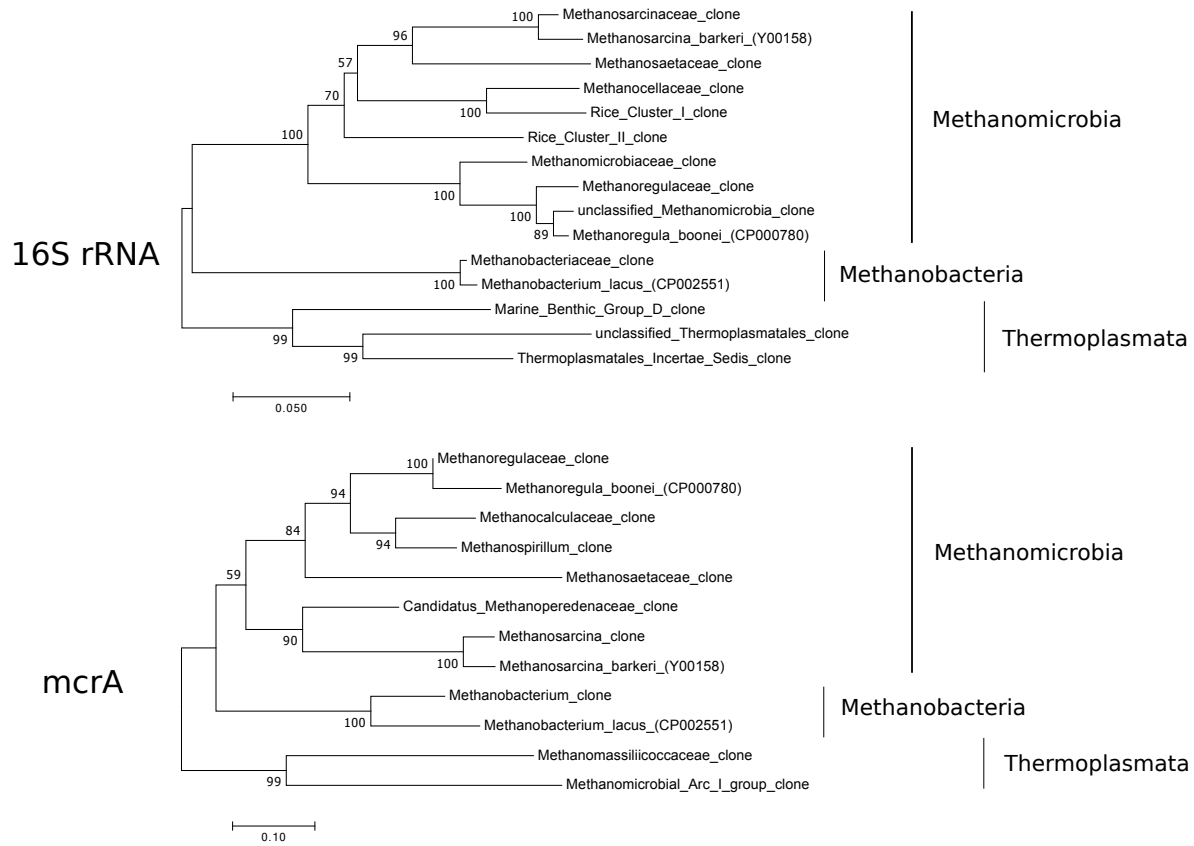

**Supplementary Figure 4. 16S rRNA and *mcrA* phylogenetic trees based on the neighbor-joining method and 100 iterations.** The trees reflect congruency of classified sequences from 16S and *mcrA* amplicon sequencing.



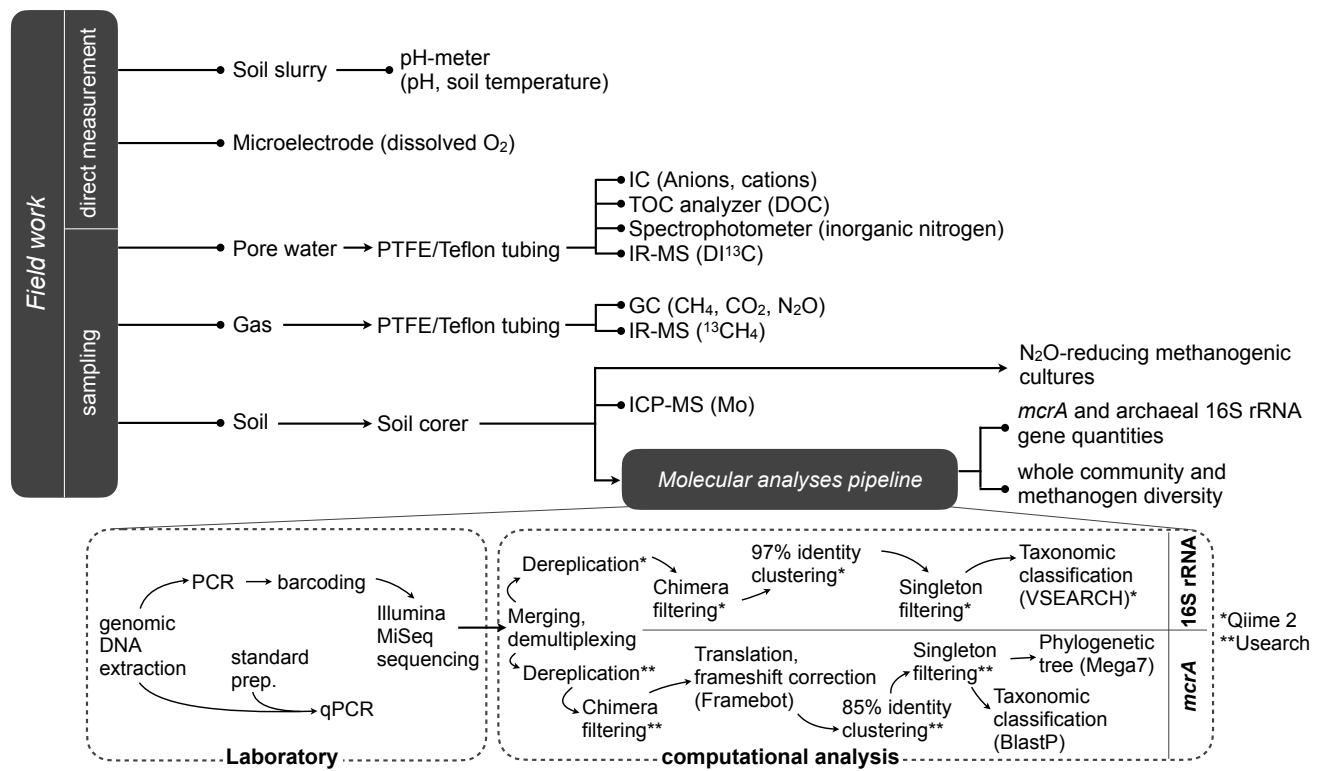

**Supplementary Figure 5.** Workflow overview including the molecular analysis pipeline.

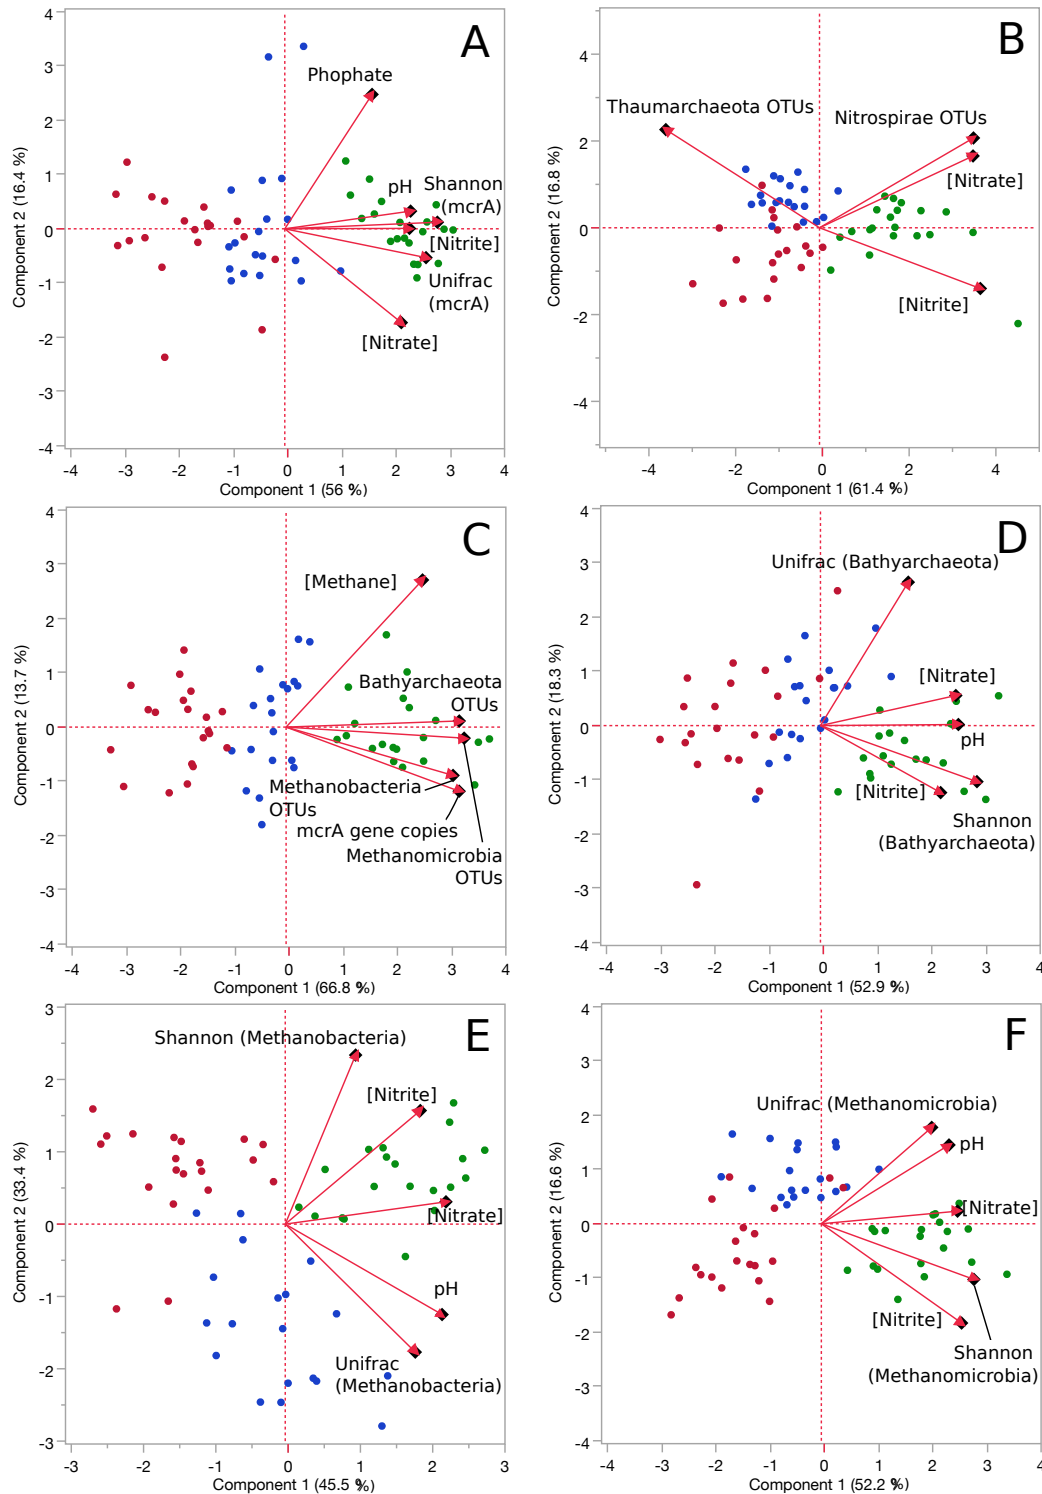

**Supplementary Figure 6. Principal component Analysis (PCA) ordination plots of microbial and environmental data from three soil profiles of contrasting Amazon peatlands.** Samples were derived from QUI (triangles), SJO (circles) and BVA (squares) with abbreviations as in Fig. 1. Extended environmental variables or microbial groups were evaluated against overall microbial communities variation. Figure 3 in main text is identical to panels C and D.

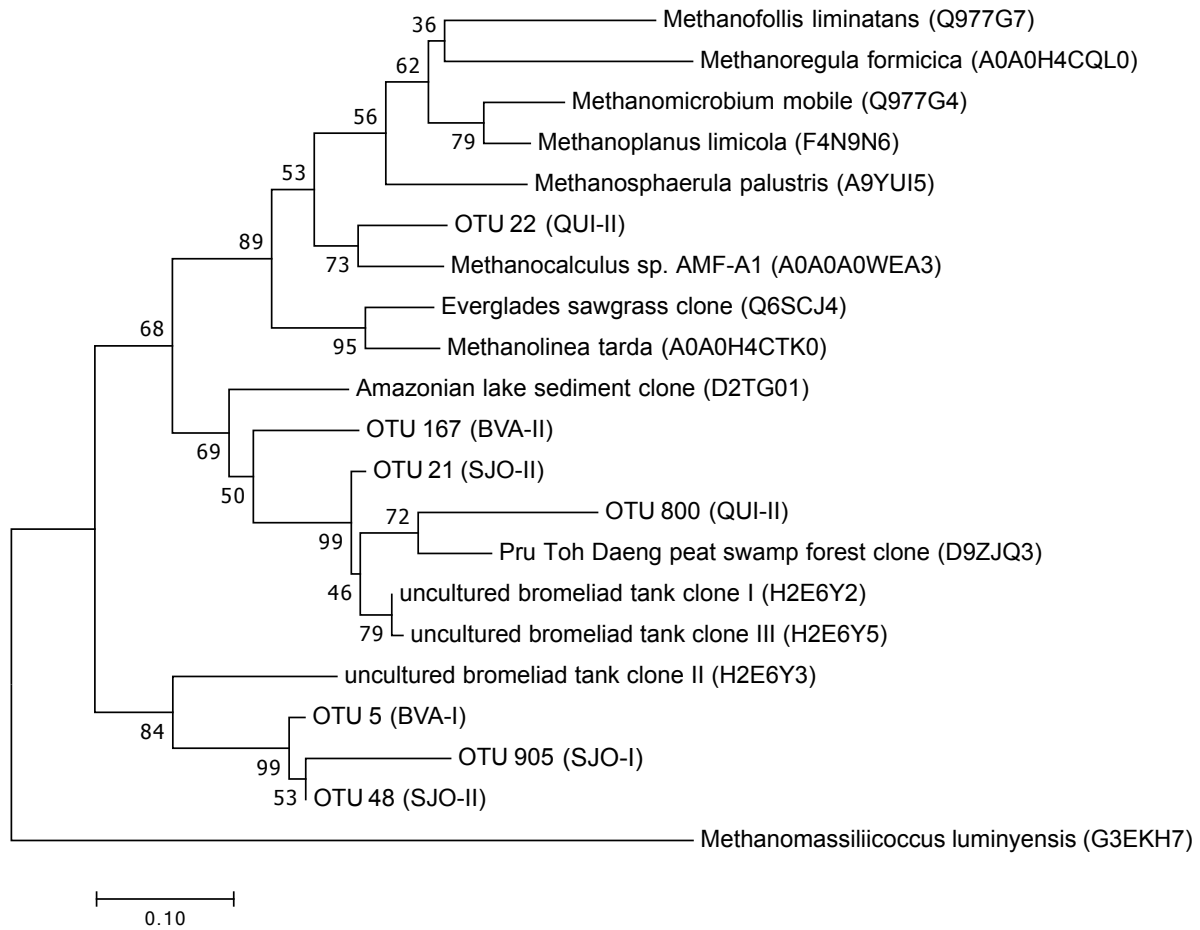

**Supplementary Figure 7. Neighbor-joining (1000 iterations) phylogenetic analysis of selected *Methanomicrobiales mcrA* sequences from three Amazon peatlands.** Reference sequences were picked from environmental data derived from tropical peatlands, Amazon lakes (Conrad et al., 2010), and tropical vegetation (Goffredi et al., 2011), and from isolates for which the accession number is provided.

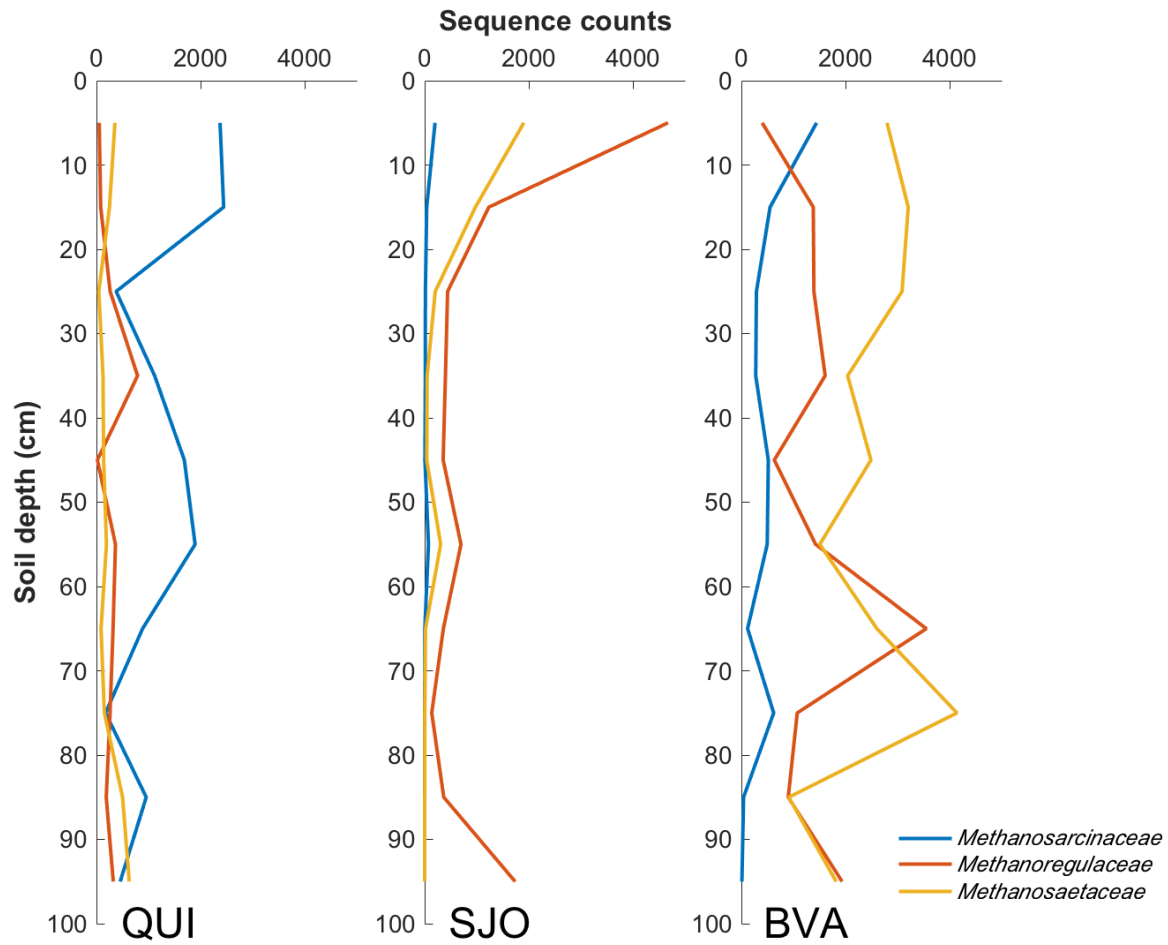

**Supplementary Figure 8.** Distribution of raw *mcrA* sequence counts along soil profiles. QUI: Quistococha, BVA: Buena Vista and SJO: San Jorge

## 2.2 Supplementary Tables

**Supplementary Table 1.** OTU abundances and microbial family metabolic capacity and traits.

| Taxon                     | Core  | Mean relative abundance along depth (%) | N metabolic reaction                                                                                                                         | Potential syntrophy with methanogen | Reference                                     |
|---------------------------|-------|-----------------------------------------|----------------------------------------------------------------------------------------------------------------------------------------------|-------------------------------------|-----------------------------------------------|
| <i>Acido-bacteriaceae</i> | QUI-1 | 5.0                                     | N respiration not a dominant feature of this family.                                                                                         |                                     | Rosenberg et al., 2014                        |
|                           | QUI-2 | 3.5                                     |                                                                                                                                              |                                     |                                               |
|                           | SJO-1 | 8.3                                     |                                                                                                                                              |                                     |                                               |
|                           | SJO-2 | 6.0                                     |                                                                                                                                              |                                     |                                               |
|                           | BVA-1 | 0.7                                     |                                                                                                                                              |                                     |                                               |
|                           | BVA-2 | 0.7                                     |                                                                                                                                              |                                     |                                               |
| <i>Solibacteraceae</i>    | QUI-1 | 1.3                                     | N respiration not a dominant feature of this family.                                                                                         |                                     | Eichorst et al., 2011                         |
|                           | QUI-2 | 0.8                                     |                                                                                                                                              |                                     |                                               |
|                           | SJO-1 | 2.3                                     |                                                                                                                                              |                                     |                                               |
|                           | SJO-2 | 1.3                                     |                                                                                                                                              |                                     |                                               |
|                           | BVA-1 | 0.3                                     |                                                                                                                                              |                                     |                                               |
|                           | BVA-2 | 0.2                                     |                                                                                                                                              |                                     |                                               |
| <i>Acido-thermaceae</i>   | QUI-1 | 1.3                                     | Denitrification ( <i>Acidothermus</i> ) not verified in culture.                                                                             |                                     | Barta et al., 2017<br>Mohagheghi et al., 1986 |
|                           | QUI-2 | 0.5                                     |                                                                                                                                              |                                     |                                               |
|                           | SJO-1 | 1.6                                     |                                                                                                                                              |                                     |                                               |
|                           | SJO-2 | 1.4                                     |                                                                                                                                              |                                     |                                               |
|                           | BVA-1 | 0.1                                     |                                                                                                                                              |                                     |                                               |
|                           | BVA-2 | 0.1                                     |                                                                                                                                              |                                     |                                               |
| <i>Bacillaceae</i>        | QUI-1 | 8.4                                     | Denitrification, DNRA and sole N <sub>2</sub> O reduction ( <i>Bacillus</i> and <i>Geobacillus</i> ). Nitrate reduction verified in culture. |                                     | Mandić-Mulec et al., 2015                     |
|                           | QUI-2 | 2.1                                     |                                                                                                                                              |                                     |                                               |
|                           | SJO-1 | 0.0                                     |                                                                                                                                              |                                     |                                               |
|                           | SJO-2 | 0.0                                     |                                                                                                                                              |                                     |                                               |
|                           | BVA-1 | 0.2                                     |                                                                                                                                              |                                     |                                               |
|                           | BVA-2 | 0.2                                     |                                                                                                                                              |                                     |                                               |
| <i>Paeni-bacillaceae</i>  | QUI-1 | 2.7                                     | Nitrate reduction and N fixation ( <i>Paenibacillus</i> ). Nitrate reduction verified in culture.                                            |                                     | Yoon, 2003<br>Beneduzi et al., 2010           |
|                           | QUI-2 | 0.1                                     |                                                                                                                                              |                                     |                                               |
|                           | SJO-1 | 0.0                                     |                                                                                                                                              |                                     |                                               |
|                           | SJO-2 | 0.0                                     |                                                                                                                                              |                                     |                                               |
|                           | BVA-1 | 0.9                                     |                                                                                                                                              |                                     |                                               |
|                           | BVA-2 | 0.6                                     |                                                                                                                                              |                                     |                                               |

Supplementary Table 1 continued

| Taxon                    | Core  | Mean relative abundance along depth (%) | N metabolic reaction                                                                                                                                  | Potential syntrophy with methanogen | Reference                              |
|--------------------------|-------|-----------------------------------------|-------------------------------------------------------------------------------------------------------------------------------------------------------|-------------------------------------|----------------------------------------|
| <i>Nitrospiraceae</i>    | QUI-1 | 0.5                                     | Nitrite oxidation ( <i>Nitrospira</i> ), Fe <sup>2+</sup> oxidation ( <i>Leptosprillum</i> ). Nitrite oxidation verified in culture.                  |                                     | Rosenberg et al., 2014                 |
|                          | QUI-2 | 0.5                                     |                                                                                                                                                       |                                     |                                        |
|                          | SJO-1 | 0.7                                     |                                                                                                                                                       |                                     |                                        |
|                          | SJO-2 | 0.9                                     |                                                                                                                                                       |                                     |                                        |
|                          | BVA-1 | 3.7                                     |                                                                                                                                                       |                                     |                                        |
|                          | BVA-2 | 3.3                                     |                                                                                                                                                       |                                     |                                        |
| <i>Planctomycetaceae</i> | QUI-1 | 3.0                                     | Anammox (Cand. Anammoximicrobium), Nitrate reduction ( <i>Planctomyces</i> , <i>Rhodopirellula</i> ). Nitrate reduction verified in culture.          |                                     | Khramenkov et al., 2013                |
|                          | QUI-2 | 1.6                                     |                                                                                                                                                       |                                     |                                        |
|                          | SJO-1 | 1.9                                     |                                                                                                                                                       |                                     |                                        |
|                          | SJO-2 | 1.9                                     |                                                                                                                                                       |                                     | Bondoso et al., 2014                   |
|                          | BVA-1 | 2.2                                     |                                                                                                                                                       |                                     |                                        |
|                          | BVA-2 | 2.1                                     |                                                                                                                                                       |                                     |                                        |
| <i>Bradyrhizobiaceae</i> | QUI-1 | 0.1                                     | Nitrite oxidation ( <i>Nitrobacter</i> ), N fixation ( <i>Bradyrhizobium</i> ). N mineralization and nitrate production activity verified in culture. |                                     | Zahran, 1999<br>Rosenberg et al., 2014 |
|                          | QUI-2 | 0.1                                     |                                                                                                                                                       |                                     |                                        |
|                          | SJO-1 | 0.2                                     |                                                                                                                                                       |                                     |                                        |
|                          | SJO-2 | 0.1                                     |                                                                                                                                                       |                                     |                                        |
|                          | BVA-1 | 0.2                                     |                                                                                                                                                       |                                     |                                        |
|                          | BVA-2 | 0.1                                     |                                                                                                                                                       |                                     |                                        |
| <i>Hyphomicrobiaceae</i> | QUI-1 | 0.5                                     | Denitrification ( <i>Hyphomicrobium</i> ). Nitrate reduction verified in culture.                                                                     |                                     | Martineau et al., 2015                 |
|                          | QUI-2 | 0.3                                     |                                                                                                                                                       |                                     |                                        |
|                          | SJO-1 | 0.1                                     |                                                                                                                                                       |                                     |                                        |
|                          | SJO-2 | 0.6                                     |                                                                                                                                                       |                                     |                                        |
|                          | BVA-1 | 0.9                                     |                                                                                                                                                       |                                     |                                        |
|                          | BVA-2 | 0.7                                     |                                                                                                                                                       |                                     |                                        |
| <i>Xanthobacteraceae</i> | QUI-1 | 2.3                                     | N fixation.                                                                                                                                           |                                     | Rosenberg et al., 2014                 |
|                          | QUI-2 | 1.7                                     |                                                                                                                                                       |                                     |                                        |
|                          | SJO-1 | 4.1                                     |                                                                                                                                                       |                                     |                                        |
|                          | SJO-2 | 5.4                                     |                                                                                                                                                       |                                     |                                        |
|                          | BVA-1 | 2.0                                     |                                                                                                                                                       |                                     |                                        |
|                          | BVA-2 | 1.9                                     |                                                                                                                                                       |                                     |                                        |

**Supplementary Table 1** continued

| <b>Taxon</b>              | <b>Core</b> | <b>Mean relative abundance along depth (%)</b> | <b>N metabolic reaction</b>                  | <b>Potential syntrophy with methanogen</b> | <b>Reference</b>                                   |
|---------------------------|-------------|------------------------------------------------|----------------------------------------------|--------------------------------------------|----------------------------------------------------|
| <i>Rhodo-spirillaceae</i> | QUI-1       | 0.5                                            | N fixation ( <i>Azospirillum</i> ),          |                                            | Rosenberg et al., 2014                             |
|                           | QUI-2       | 0.4                                            | Nitrate reduction                            |                                            |                                                    |
|                           | SJO-1       | 0.6                                            | ( <i>Azospirillum</i> ,                      |                                            |                                                    |
|                           | SJO-2       | 0.5                                            | <i>Magneto-spirillum</i> ), N <sub>2</sub> O |                                            |                                                    |
|                           | BVA-1       | 0.2                                            | reduction ( <i>Azospirillum</i> ).           |                                            |                                                    |
|                           | BVA-2       | 0.2                                            | Nitrate reduction verified in culture.       |                                            |                                                    |
| <i>Alcaligenaceae</i>     | QUI-1       | 0.2                                            | Nitrate reduction ( <i>Candidimonas</i> ),   |                                            | Rosenberg et al., 2014<br>Vaz-Moreira et al., 2011 |
|                           | QUI-2       | 0.2                                            | Nitrite reduction ( <i>Alcaligenes</i> ).    |                                            |                                                    |
|                           | SJO-1       | 0.5                                            | Nitrate reduction                            |                                            |                                                    |
|                           | SJO-2       | 0.4                                            | verified in culture.                         |                                            |                                                    |
|                           | BVA-1       | 0.0                                            |                                              |                                            |                                                    |
|                           | BVA-2       | 0.0                                            |                                              |                                            |                                                    |
| <i>Burkholderiaceae</i>   | QUI-1       | 0.3                                            | Denitrification.                             |                                            | Rosenberg et al., 2014                             |
|                           | QUI-2       | 1.6                                            | Nitrate reduction verified in culture.       |                                            |                                                    |
|                           | SJO-1       | 18.6                                           |                                              |                                            |                                                    |
|                           | SJO-2       | 11.1                                           |                                              |                                            |                                                    |
|                           | BVA-1       | 0.2                                            |                                              |                                            |                                                    |
|                           | BVA-2       | 0.2                                            |                                              |                                            |                                                    |
| <i>Comamonadaceae</i>     | QUI-1       | 0.0                                            | Nitrate reduction ( <i>Comamonas</i> ,       |                                            | Rosenberg et al., 2014                             |
|                           | QUI-2       | 0.0                                            | <i>Brachymonas</i> ,                         |                                            |                                                    |
|                           | SJO-1       | 0.4                                            | <i>Diaphorobacter</i> ).                     |                                            |                                                    |
|                           | SJO-2       | 0.0                                            | Nitrate reduction                            |                                            |                                                    |
|                           | BVA-1       | 1.1                                            | verified in culture.                         |                                            |                                                    |
|                           | BVA-2       | 1.2                                            |                                              |                                            |                                                    |
| <i>Neisseriaceae</i>      | QUI-1       | 0.0                                            | Nitrite and NO                               |                                            | Rock et al., 2005                                  |
|                           | QUI-2       | 0.0                                            | reduction ( <i>Neisseria</i> ).              |                                            |                                                    |
|                           | SJO-1       | 1.9                                            | Nitrite reduction                            |                                            |                                                    |
|                           | SJO-2       | 0.0                                            | verified in culture.                         |                                            |                                                    |
|                           | BVA-1       | 0.2                                            |                                              |                                            |                                                    |
|                           | BVA-2       | 0.3                                            |                                              |                                            |                                                    |

Supplementary Table 1 continued

| Taxon                       | Core  | Mean relative abundance along depth (%) | N metabolic reaction                                                                       | Potential syntrophy with methanogen                                                                                                                                              | Reference                   |
|-----------------------------|-------|-----------------------------------------|--------------------------------------------------------------------------------------------|----------------------------------------------------------------------------------------------------------------------------------------------------------------------------------|-----------------------------|
| <i>Nitroso-monadaceae</i>   | QUI-1 | 0.1                                     | Ammonia oxidation. Verified in culture.                                                    |                                                                                                                                                                                  | Rosenberg et al., 2014      |
|                             | QUI-2 | 0.0                                     |                                                                                            |                                                                                                                                                                                  |                             |
|                             | SJO-1 | 0.0                                     |                                                                                            |                                                                                                                                                                                  |                             |
|                             | SJO-2 | 0.0                                     |                                                                                            |                                                                                                                                                                                  |                             |
|                             | BVA-1 | 0.8                                     |                                                                                            |                                                                                                                                                                                  |                             |
|                             | BVA-2 | 0.7                                     |                                                                                            |                                                                                                                                                                                  |                             |
| <i>Desulfurellaceae</i>     | QUI-1 | 0.5                                     |                                                                                            | H <sub>2</sub> consumption and syntrophic association with methanogen? Competition possible. Propionate oxidation and syntrophy with methanogens. Syntrophy studied in cultures. | Miroshnichenko et al., 1998 |
|                             | QUI-2 | 0.4                                     |                                                                                            |                                                                                                                                                                                  |                             |
|                             | SJO-1 | 0.9                                     |                                                                                            |                                                                                                                                                                                  |                             |
|                             | SJO-2 | 0.5                                     |                                                                                            |                                                                                                                                                                                  |                             |
|                             | BVA-1 | 0.8                                     |                                                                                            |                                                                                                                                                                                  |                             |
|                             | BVA-2 | 0.7                                     |                                                                                            |                                                                                                                                                                                  |                             |
| <i>Syntrophaceae</i>        | QUI-1 | 1.0                                     |                                                                                            | Fermenter or syntrophic association with H <sub>2</sub> /formate-utilizing partners. Syntrophy studied in cultures.                                                              | Lueders et al., 2003        |
|                             | QUI-2 | 1.2                                     |                                                                                            |                                                                                                                                                                                  |                             |
|                             | SJO-1 | 0.6                                     |                                                                                            |                                                                                                                                                                                  |                             |
|                             | SJO-2 | 0.8                                     |                                                                                            |                                                                                                                                                                                  |                             |
|                             | BVA-1 | 2.1                                     |                                                                                            |                                                                                                                                                                                  |                             |
| <i>Syntrophobacteraceae</i> | BVA-2 | 1.7                                     |                                                                                            |                                                                                                                                                                                  | Rosenberg et al., 2014      |
|                             | QUI-1 | 0.8                                     |                                                                                            |                                                                                                                                                                                  |                             |
|                             | QUI-2 | 0.6                                     |                                                                                            |                                                                                                                                                                                  |                             |
|                             | SJO-1 | 1.1                                     |                                                                                            |                                                                                                                                                                                  |                             |
|                             | SJO-2 | 0.8                                     |                                                                                            |                                                                                                                                                                                  |                             |
|                             | BVA-1 | 0.4                                     |                                                                                            |                                                                                                                                                                                  |                             |
| <i>Pseudomonadaceae</i>     | BVA-2 | 0.3                                     | Denitrification ( <i>Pseudomonas</i> ). Nitrate and nitrite reduction verified in culture. |                                                                                                                                                                                  | Rosenberg et al., 2014      |
|                             | QUI-1 | 2.2                                     |                                                                                            |                                                                                                                                                                                  |                             |
|                             | QUI-2 | 1.9                                     |                                                                                            |                                                                                                                                                                                  |                             |
|                             | SJO-1 | 0.0                                     |                                                                                            |                                                                                                                                                                                  |                             |
|                             | SJO-2 | 0.0                                     |                                                                                            |                                                                                                                                                                                  |                             |
|                             | BVA-1 | 1.0                                     |                                                                                            |                                                                                                                                                                                  |                             |
| BVA-2                       | 1.3   |                                         |                                                                                            |                                                                                                                                                                                  |                             |



**Supplementary Table 1** continued

| <b>Taxon</b>           | <b>Core</b> | <b>Mean relative abundance along depth (%)</b> | <b>N metabolic reaction</b> | <b>Potential syntrophy with methanogen</b>                          | <b>Reference</b>      |
|------------------------|-------------|------------------------------------------------|-----------------------------|---------------------------------------------------------------------|-----------------------|
| <i>Spirochaetaceae</i> | QUI-1       | 0.8                                            |                             | Fermenter with known                                                | Troshina et al., 2015 |
|                        | QUI-2       | 0.7                                            |                             | syntrophic association                                              |                       |
|                        | SJO-1       | 0.5                                            |                             | with                                                                |                       |
|                        | SJO-2       | 0.6                                            |                             | methano-                                                            |                       |
|                        | BVA-1       | 1.0                                            |                             | gens<br>( <i>Sphaerochaeta</i> ).<br>Syntrophy studied in cultures. |                       |
| <i>Opitutaceae</i>     | BVA-2       | 1.0                                            |                             | Propionate production                                               | Chin et al., 2001     |
|                        | QUI-1       | 0.1                                            | N fixation                  | ( <i>Diplosphaera</i> )                                             |                       |
|                        | QUI-2       | 0.1                                            | and nitrate                 | reduction                                                           |                       |
|                        | SJO-1       | 0.1                                            | ( <i>Opitutus</i> ).        | Syntrophy not assessed                                              |                       |
|                        | SJO-2       | 0.1                                            | Nitrate reduction           | in culture.                                                         |                       |
|                        | BVA-1       | 0.0                                            | verified in                 | culture.                                                            |                       |
| BVA-2                  | 0.1         |                                                |                             |                                                                     |                       |

**Supplementary Table 2.** Spearman's rank multivariate analysis of geochemical parameters (pH and concentration of different species) and selected methanogen taxa. Increasing positive correlation is indicated by blue text color and increasing negative correlation is indicated by red text color. Correlation of a parameter with itself = 1.0.

| <i>Quistococha (QUJ)</i> | pH      | Phosphate | Nitrite | Nitrate | Ammonium | Sulfate | Methanobacteriaceae | Methanoregulaceae | Methanosaeataceae | Methanosarcinaceae | Methanocellaceae | Methanomassiliococcaceae |
|--------------------------|---------|-----------|---------|---------|----------|---------|---------------------|-------------------|-------------------|--------------------|------------------|--------------------------|
| pH                       | 1.0000  | -0.0301   | -0.0840 | 0.4560  | -0.4968  | -0.3888 | 0.1907              | -0.3200           | -0.4336           | 0.4939             | -0.3586          | 0.3818                   |
| Phosphate                | -0.0301 | 1.0000    | -0.0118 | -0.2441 | 0.3215   | -0.0392 | -0.0514             | 0.1474            | 0.3532            | -0.0640            | -0.0196          | -0.2264                  |
| Nitrite                  | -0.0840 | 0.0118    | 1.0000  | 0.0845  | 0.1631   | -0.1345 | 0.4523              | -0.1629           | 0.0762            | 0.3139             | -0.0765          | 0.3098                   |
| Nitrate                  | 0.4560  | -0.2441   | 0.0845  | 1.0000  | -0.3187  | -0.3320 | 0.0627              | -0.1910           | -0.1808           | 0.0347             | -0.2097          | 0.0853                   |
| Ammonium                 | -0.4968 | 0.3215    | 0.1631  | -0.3187 | 1.0000   | 0.5091  | -0.3472             | 0.3686            | 0.4532            | -0.3578            | -0.0966          | -0.4121                  |
| Sulfate                  | -0.3888 | -0.0392   | -0.1345 | -0.3320 | 0.5091   | 1.0000  | -0.0674             | 0.0874            | 0.4966            | -0.1086            | -0.0606          | -0.0065                  |
| Methanobacteriaceae      | 0.1907  | -0.0514   | 0.4523  | 0.0627  | -0.3472  | -0.0674 | 1.0000              | -0.3189           | 0.2621            | 0.7457             | -0.0584          | 0.8491                   |
| Methanoregulaceae        | -0.3200 | 0.1474    | -0.1629 | -0.1910 | 0.3686   | 0.1930  | -0.3189             | 1.0000            | 0.1815            | -0.2867            | 0.1087           | -0.4746                  |
| Methanosaeataceae        | -0.4336 | 0.3532    | 0.0762  | -0.1808 | 0.4532   | 0.4966  | 0.2621              | 0.1815            | 1.0000            | 0.0793             | -0.1805          | -0.0388                  |
| Methanosarcinaceae       | 0.4939  | -0.0640   | 0.3139  | 0.0347  | -0.3578  | -0.1086 | 0.7457              | -0.2867           | -0.1805           | 1.0000             | -0.3540          | 0.7585                   |
| Methanocellaceae         | -0.3586 | -0.0196   | -0.0765 | -0.2097 | -0.0966  | -0.0606 | -0.0584             | 0.1087            | -0.3540           | 0.0793             | 1.0000           | -0.1510                  |
| Methanomassiliococcaceae | 0.3818  | -0.2264   | 0.3098  | 0.0853  | -0.4121  | -0.0065 | 0.8491              | -0.4746           | -0.0388           | 0.7585             | -0.1510          | 1.0000                   |
| <i>San Jorge (SJO)</i>   |         |           |         |         |          |         |                     |                   |                   |                    |                  |                          |
| pH                       | 1.0000  | 0.3968    | 0.0302  | -0.0287 | -0.1371  | 0.2855  | -0.1593             | -0.3097           | -0.0479           | -0.2067            | -0.1164          | -0.0454                  |
| Phosphate                | 0.3968  | 1.0000    | 0.0339  | -0.1553 | -0.1813  | 0.4215  | -0.3666             | -0.3588           | -0.1796           | -0.1216            | -0.0081          | -0.1393                  |
| Nitrite                  | 0.0302  | 0.0339    | 1.0000  | 0.0457  | -0.4562  | -0.6845 | 0.0284              | 0.0529            | 0.2279            | 0.0262             | 0.0845           | 0.0646                   |
| Nitrate                  | -0.0287 | -0.1553   | 0.0457  | 1.0000  | -0.4835  | -0.2225 | 0.0737              | 0.2166            | 0.6195            | 0.7156             | 0.4142           | 0.6312                   |
| Ammonium                 | -0.1371 | -0.1813   | -0.4562 | -0.4835 | 1.0000   | 0.0822  | -0.0870             | -0.2831           | -0.4339           | -0.4213            | -0.3646          | -0.3895                  |
| Sulfate                  | 0.2855  | 0.4215    | -0.6845 | -0.2225 | 0.0822   | 1.0000  | -0.2405             | -0.0831           | -0.2052           | -0.1255            | 0.1085           | 0.1016                   |
| Methanobacteriaceae      | -0.1593 | -0.3666   | 0.0284  | 0.0737  | -0.0870  | -0.2405 | 1.0000              | 0.3381            | 0.1431            | 0.0788             | 0.0443           | 0.0312                   |
| Methanoregulaceae        | -0.3097 | -0.3588   | 0.0529  | 0.2166  | -0.2831  | -0.0831 | 0.3381              | 1.0000            | 0.8278            | 0.7137             | 0.8891           | 0.8934                   |
| Methanosaeataceae        | -0.0479 | -0.1796   | 0.2279  | 0.6195  | -0.4339  | -0.2052 | 0.1431              | 0.8278            | 1.0000            | 0.8978             | 0.9441           | 0.9523                   |
| Methanosarcinaceae       | -0.2067 | -0.1216   | 0.0262  | 0.7156  | -0.4213  | -0.1255 | 0.0788              | 0.7137            | 0.8978            | 1.0000             | 0.8211           | 0.9109                   |
| Methanocellaceae         | -0.1164 | -0.0081   | 0.0845  | 0.4142  | -0.3646  | 0.1085  | 0.0443              | 0.8891            | 0.9441            | 0.8211             | 1.0000           | 0.8918                   |
| Methanomassiliococcaceae | -0.0454 | -0.1393   | 0.0646  | 0.6312  | -0.3895  | 0.0106  | 0.0312              | 0.8934            | 0.9523            | 0.9109             | 0.8918           | 1.0000                   |
| <i>Buena Vista (BVA)</i> |         |           |         |         |          |         |                     |                   |                   |                    |                  |                          |
| pH                       | 1.0000  | 0.4727    | 0.4142  | 0.1493  | -0.5684  | -0.1202 | -0.2784             | -0.2500           | -0.0645           | -0.2370            | -0.3571          | -0.0748                  |
| Phosphate                | 0.4727  | 1.0000    | -0.2895 | -0.2556 | -0.2537  | 0.2779  | -0.0417             | 0.5263            | 0.2637            | -0.2523            | -0.5575          | 0.3445                   |
| Nitrite                  | 0.4142  | -0.2895   | 1.0000  | 0.0650  | -0.2061  | -0.3836 | 0.0358              | -0.7433           | -0.3041           | 0.1434             | 0.2857           | -0.3409                  |
| Nitrate                  | 0.1493  | -0.2556   | 0.0650  | 1.0000  | -0.1896  | -0.0061 | 0.4202              | -0.0995           | 0.2631            | 0.5589             | 0.6293           | 0.2669                   |
| Ammonium                 | -0.5684 | -0.2537   | -0.2061 | -0.1896 | 1.0000   | -0.4134 | -0.1979             | -0.4331           | -0.3100           | -0.3100            | -0.2903          | -0.4689                  |
| Sulfate                  | -0.1202 | 0.2779    | -0.3836 | -0.0061 | -0.4134  | 1.0000  | -0.0491             | 0.3826            | 0.3345            | -0.3075            | -0.1694          | -0.4689                  |
| Methanobacteriaceae      | -0.2784 | -0.0417   | 0.0358  | 0.4202  | -0.1979  | -0.0491 | 1.0000              | -0.2560           | 0.7044            | 0.8408             | -0.3427          | 0.6608                   |
| Methanoregulaceae        | -0.2500 | 0.5263    | -0.7433 | -0.0995 | 0.1439   | 0.3826  | -0.2560             | 1.0000            | 0.1582            | -0.3427            | -0.3952          | 0.1766                   |
| Methanosaeataceae        | -0.0645 | 0.2637    | -0.3041 | 0.2631  | -0.4331  | 0.3345  | 0.7044              | 0.1582            | 1.0000            | 0.4764             | 0.3952           | 0.8377                   |
| Methanosarcinaceae       | -0.2370 | -0.2523   | 0.1434  | 0.5589  | -0.3100  | -0.3075 | 0.8408              | -0.3427           | 0.4764            | 1.0000             | 0.8553           | 0.5254                   |
| Methanocellaceae         | -0.3571 | -0.5575   | 0.2857  | 0.6293  | -0.2903  | -0.1694 | 0.7744              | -0.3395           | 0.3952            | 0.8553             | 1.0000           | 0.3838                   |
| Methanomassiliococcaceae | -0.0748 | 0.3445    | -0.3409 | 0.2669  | -0.4689  | 0.3492  | 0.6608              | 0.1766            | 0.8377            | 0.5254             | 0.3838           | 1.0000                   |

### 3 Supplementary References

- Artz, R., Chapman, S., and Campbell, C. (2006). Substrate utilisation profiles of microbial communities in peat are depth dependent and correlate with whole soil FTIR profiles. *Soil Biology and Biochemistry* 38, 2958–2962. doi:10.1016/j.soilbio.2006.04.017.
- Bai, Y., Wang, J., Zhan, Z., Guan, L., Jin, L., Zheng, G., et al. (2018). The variation of microbial communities in a depth profile of peat in the Gahai Lake wetland natural conservation area. *Geomicrobiology Journal* 35, 484–490. doi:10.1080/01490451.2017.1392651.
- Barta, J., Tahovska, K., Santruckova, H., and Oulehle, F. (2017). Microbial communities with distinct denitrification potential in spruce and beech soils differing in nitrate leaching. *Sci. Rep.* 7, 1–15. doi:DOI:10.1038/s41598-017-08554-1.
- Beneduzi, A., Costa, P. B., Parma, M., Melo, I. S., Bodanese-Zanettini, M. H., and Passaglia, L. M. P. (2010). *Paenibacillus riograndensis* sp. nov., a nitrogen-fixing species isolated from the rhizosphere of *Triticum aestivum*. *International Journal Of Systematic And Evolutionary Microbiology* 60, 128–133. doi:10.1099/ijs.0.011973-0.
- Bondoso, J., Albuquerque, L., Lobo-da-Cunha, A., da Costa, M. S., Harder, J., and Lage, O. M. (2014). *Rhodopirellula lusitana* sp. nov. and *Rhodopirellula rubra* sp. nov., isolated from the surface of macroalgae. *Systematic and Applied Microbiology* 37, 157–164. doi:10.1016/j.syapm.2013.11.004.
- Chin, K.-J., Liesack, W., and Janssen, P. H. (2001). *Opiritatus terrae* gen. nov., sp. nov., to accommodate novel strains of the division “*Verrucomicrobia*” isolated from rice paddy soil. *International Journal of Systematic Bacteriology* 51, 1965–1968.
- Eichorst, S. A., Kuske, C. R., and Schmidt, T. M. (2011). Influence of plant polymers on the distribution and cultivation of bacteria in the phylum *Acidobacteria*. *Appl. Environ. Microbiol.* 77, 586–596. doi:10.1128/AEM.01080-10.
- Evans, P. N., Parks, D. H., Chadwick, G. L., Robbins, S. J., Orphan, V. J., Golding, S. D., et al. (2015). Methane metabolism in the archaeal phylum Bathyarchaeota revealed by genome-centric metagenomics. *Science* 350, 434–438.
- Florentino, A. P., Stams, A. J. M., and Sánchez-Andrea, I. (2017). Genome sequence of *Desulfurella amilsii* strain TR1 and comparative genomics of *Desulfurellaceae* Family. *Front. Microbiol.* 8, k39. doi:10.3389/fmicb.2017.00222.
- Gandois, L., Teisserenc, R., Cobb, A. R., Chieng, H. I., Lim, L. B. L., Kamariah, A. S., et al. (2014). Origin, composition, and transformation of dissolved organic matter in tropical peatlands. *Geochimica et Cosmochimica Acta* 137, 35–47. doi:10.1016/j.gca.2014.03.012.
- Heitmann, T., Goldhammer, T., Beer, J., and Blodau, C. (2007). Electron transfer of dissolved organic matter and its potential significance for anaerobic respiration in a northern bog. *Glob Change Biol* 13, 1771–1785. doi:10.1111/j.1365-2486.2007.01382.x.
- Honório, B. A. D., Horbe, A. M. C., and Seyler, P. (2010). Chemical composition of rainwater in western Amazonia — Brazil. *Atmospheric Research* 98, 416–425.

doi:10.1016/j.atmosres.2010.08.001.

- Khramenkov, S. V., Kozlov, M. N., Kevbrina, M. V., Dorofeev, A. G., Kazakova, E. A., Grachev, V. A., et al. (2013). A novel bacterium carrying out anaerobic ammonium oxidation in a reactor for biological treatment of the filtrate of wastewater fermented sludge. *Microbiology* 82, 628–636. doi:10.1134/S002626171305007X.
- Knorr, K.-H., and Blodau, C. (2009). Impact of experimental drought and rewetting on redox transformations and methanogenesis in mesocosms of a northern fen soil. *Soil Biology and Biochemistry* 41, 1–12. doi:10.1016/j.soilbio.2009.02.030.
- Lazar, C. S., Baker, B. J., Seitz, K., Hyde, A. S., Dick, G. J., Hinrichs, K.-U., et al. (2016). Genomic evidence for distinct carbon substrate preferences and ecological niches of Bathyarchaeota in estuarine sediments. *Environmental Microbiology* 18, 1200–1211.
- Lähteenoja, O., Ruokolainen, K., Schulman, L., and Alvarez, J. (2009). Amazonian floodplains harbour minerotrophic and ombrotrophic peatlands. *Catena* 79, 140–145. doi:10.1016/j.catena.2009.06.006.
- Liu, D., Ding, W., Jia, Z., and Cai, Z. (2012). The impact of dissolved organic carbon on the spatial variability of methanogenic archaea communities in natural wetland ecosystems across China. *Appl Microbiol Biotechnol* 96, 253–263. doi:10.1007/s00253-011-3842-x.
- Lueders, T., Wagner, B., Claus, P., and Friedrich, M. W. (2003). Stable isotope probing of rRNA and DNA reveals a dynamic methylotroph community and trophic interactions with fungi and protozoa in oxic rice field soil. *Environmental Microbiology* 6, 60–72. doi:10.1046/j.1462-2920.2003.00535.x.
- Mandić-Mulec, I., Stefanic, P., and van Elsas, J. D. (2015). Ecology of *Bacillaceae*. *Microbiology Spectrum* 3, 1–24. doi:10.1128/microbiolspec.TBS-0017-2013.
- Martineau, C., Mauffrey, F., and Villemur, R. (2015). Comparative analysis of denitrifying activities of *Hyphomicrobium nitratorans*, *Hyphomicrobium denitrificans*, and *Hyphomicrobium zavarzinii*. *Appl. Environ. Microbiol.* 81, 5003–5014. doi:10.1128/AEM.00848-15.
- Miroshnichenko, M. L., Rainey, F. A., Hippe, H., Chernyh, N. A., and Bonch-Osmolovskaya, E. A. (1998). *Desulfurella kamchatkensis* sp. nov. and *Desulfurella propionica* sp. nov., new sulfur-respiring thermophilic bacteria from Kamchatka thermal environments. *International Journal of Systematic Bacteriology* 48, 475–479.
- Moers, M. E. C., Baas, M., Boon, J. J., and De Leeuw, J. W. (1990). Molecular characterization of total organic matter and carbohydrates in peat samples from a cypress swamp by pyrolysis-mass spectrometry and wet-chemical methods. *Biogeochemistry* 11, 251–277. doi:10.1007/BF00004499.
- Mohagheghi, A., Grohmann, K., Himmel, M., Leighton, L., and Updegraff, D. M. (1986). Isolation and characterization of *Acidothermus cellulolyticus* gen. nov., sp. nov., a new genus of thermophilic, acidophilic, cellulolytic bacteria. *International Journal of Systematic Bacteriology* 36, 435–443.

- Morrissey, E. M., Berrier, D. J., Neubauer, S. C., and Franklin, R. B. (2013). Using microbial communities and extracellular enzymes to link soil organic matter characteristics to greenhouse gas production in a tidal freshwater wetland. *Biogeochemistry* 117, 473–490. doi:10.1007/s10533-013-9894-5.
- Rock, J. D., Mahnane, M. R., Anjum, M. F., Shaw, J. G., Read, R. C., and Moir, J. W. B. (2005). The pathogen *Neisseria meningitidis* requires oxygen, but supplements growth by denitrification. Nitrite, nitric oxide and oxygen control respiratory flux at genetic and metabolic levels. *Molecular Microbiology* 58, 800–809. doi:10.1111/j.1365-2958.2005.04866.x.
- Rosenberg, E., DeLong, E. F., Lory, S., Stackebrandt, E., and Thompson, F. eds. (2014). *The Prokaryotes*. Heidelberg, New York, Dordrecht, London, 4th Edition: Springer-Verlag.
- Troshina, O., Oshurkova, V., Suzina, N., Novikov, A., Shcherbakova, V., Vinokurova, N., et al. (2015). *Sphaerochaeta associata* sp. nov., a spherical spirochaete isolated from cultures of *Methanosarcina mazei* JL01. *International Journal Of Systematic And Evolutionary Microbiology* 65, 4315–4322. doi:10.1099/ijsem.0.000575.
- Vaz-Moreira, I., Figueira, V., Lopes, A. R., De Brandt, E., Vandamme, P., Nunes, O. C., et al. (2011). *Candidimonas nitroreducens* gen. nov., sp. nov. and *Candidimonas humi* sp. nov., isolated from sewage sludge compost. *International Journal Of Systematic And Evolutionary Microbiology* 61, 2238–2246. doi:10.1099/ijms.0.021188-0.
- Yang, S., Liebner, S., Winkel, M., Alawi, M., Horn, F., Dörfer, C., et al. (2017). In-depth analysis of core methanogenic communities from high elevation permafrost-affected wetlands. *Soil Biology and Biochemistry* 111, 66–77. doi:10.1016/j.soilbio.2017.03.007.
- Yoon, J. H. (2003). *Paenibacillus kribbensis* sp. nov. and *Paenibacillus terrae* sp. nov., biofloculants for efficient harvesting of algal cells. *International Journal Of Systematic And Evolutionary Microbiology* 53, 295–301. doi:10.1099/ijms.0.02108-0.
- Zahran, H. H. (1999). *Rhizobium*-legume symbiosis and nitrogen fixation under severe conditions and in an arid climate. *Microbiology and Molecular Biology Reviews* 63, 968–989.
- Zaichikova, M. V., Berestovskaya, Y. Y., Akimov, V. N., Kizilova, A. K., and Vasilieva, L. V. (2010). *Xanthobacter xylophilus* sp. nov., a member of the xylophilic mycobacterial community of low-mineral oligotrophic waters. *Microbiology* 79, 83–88. doi:10.1134/S002626171001011X.
